# Supplementary material
Source: publisher site journal article supplement (https://www.spandidos-publications.com/3202/downloadSupplementary)

Figure S1. Verification of knockdown effect of miR-29c-3p in PD mice. (A) miR-29c-3p expression was confirmed via RT-qPCR in miR-Control- and miR-29c-3p mimics-infected 293 cells. (B) miR-29c-3p expression was confirmed via RT-qPCR in miR-29c-3p inhibitor and NC injected PD mice. \*\*\* $P < 0.001$ . PD, Parkinson's' disease; RT-qPCR, reverse transcription-quantitative PCR; miR, microRNA; NC, negative control.

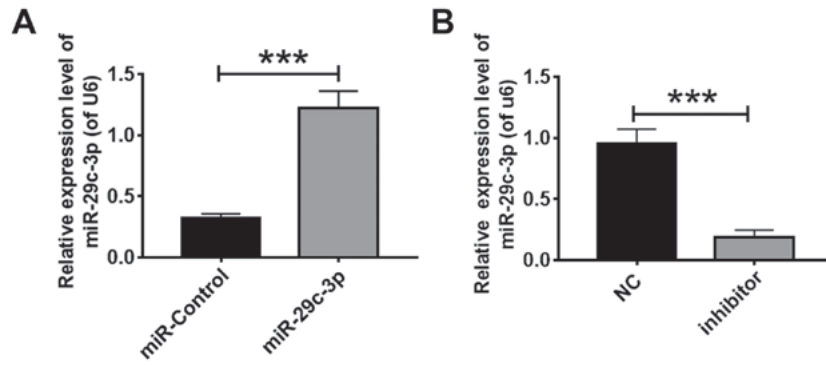

Supplement: Supplementary file 1 [file downloadSupplementary]
